# Supplementary material for: Cu–Mg–Zr/SiO2 catalyst for the selective hydrogenation of ethylene carbonate to methanol and ethylene glycol
Source: Royal Society of Chemistry journal article supplement (doi:10.1039/c8cy00023a), 2018-01-01
Supplement: c8cy00023a1.pdf [file c8cy00023a1.pdf]

# Cu-Mg-Zr/SiO<sub>2</sub> Catalyst for Selective Hydrogenation of Ethylene Carbonate to Methanol and Ethylene Glycol

Jingxia Tian<sup>a</sup>, Wei Chen<sup>a</sup>, Peng Wu<sup>a</sup>, Zhirong Zhu<sup>b</sup>, Xiaohong Li<sup>a,\*</sup>

## Supporting Information

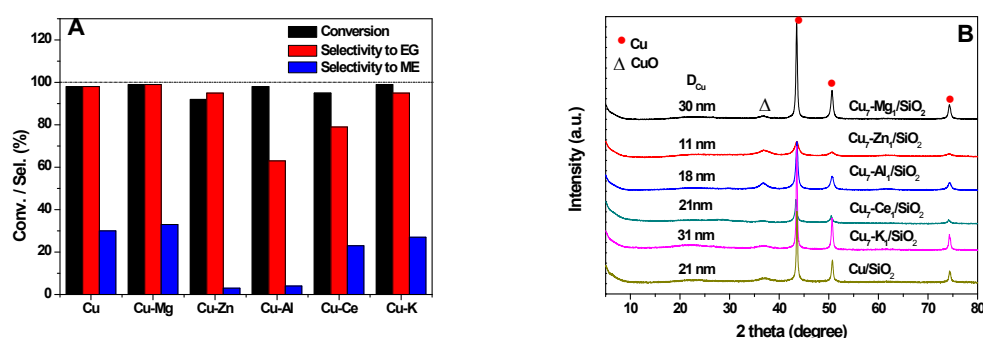

**Fig. S1.** (A) The conversion of EC, the selectivity to EG and ME with various supported Cu catalysts. Reaction conditions: 1 g of the as-calcined Cu/SiO<sub>2</sub> or Cu<sub>7</sub>-M<sub>1</sub>/SiO<sub>2</sub> catalyst precursor *in situ* reduced at 350 °C in 2.0 MPa H<sub>2</sub>; Reaction temp. = 180 °C, H<sub>2</sub> = 60 ml/min, GHSV<sub>H<sub>2</sub></sub> = 2400, WHSV<sub>EC</sub> = 0.13, 2.0 MPa of H<sub>2</sub>. (B) The XRD patterns of the Cu<sub>7</sub>-M<sub>1</sub>/SiO<sub>2</sub> catalysts.

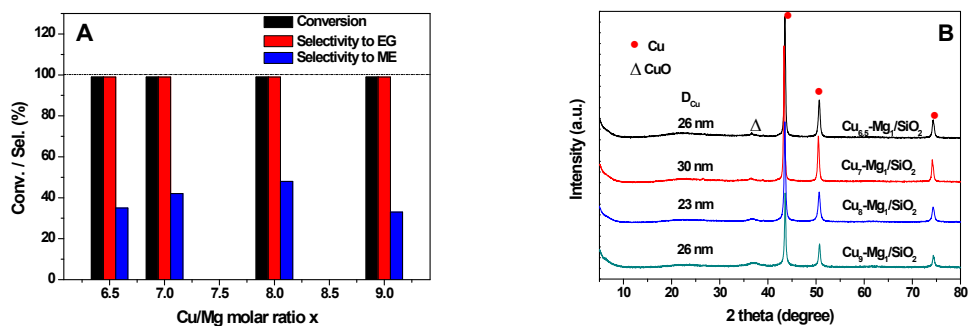

**Fig. S2.** (A) The conversion of EC, the selectivity to EG and ME with  $Cu_x-Mg_1/SiO_2$  catalysts. Reaction conditions: the reaction conditions are identical with those for Fig. S1 except that 3 MPa of  $H_2$  was adopted. (B) The XRD patterns of the  $Cu_x-Mg_1/SiO_2$  catalysts.

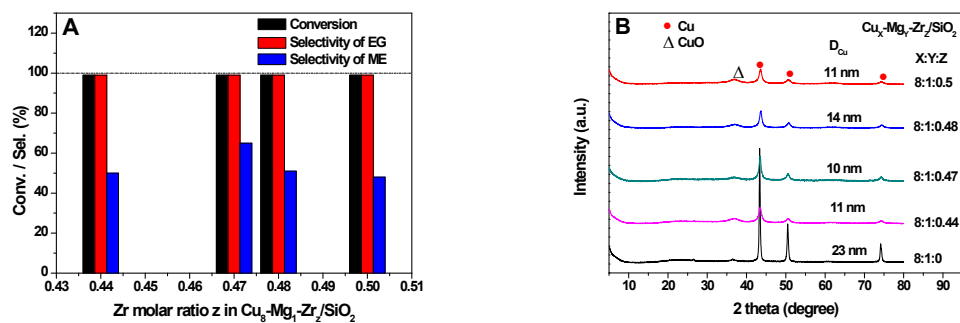

**Fig. S3.** (A) The conversion of EC, the selectivity to EG and ME with  $\text{Cu}_8\text{-Mg}_1\text{-Zr}_z\text{/SiO}_2$  catalysts, the reaction conditions are identical with those for Fig. S2. (B) The XRD patterns of the  $\text{Cu}_8\text{-Mg}_1\text{-Zr}_z\text{/SiO}_2$  catalysts.

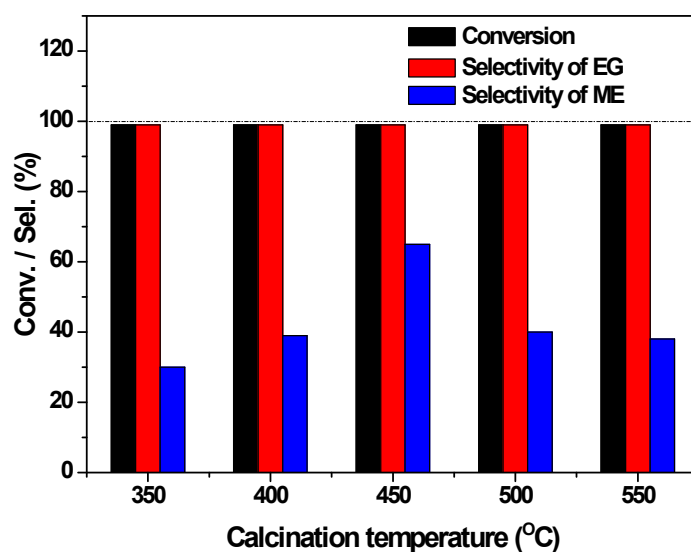

**Fig. S4.** The conversion of EC, the selectivity to EG and ME versus  $\text{Cu}_8\text{-Mg}_1\text{-Zr}_{0.47}/\text{SiO}_2$  catalyst precursor calcination temperature. The reaction parameters are identical with those for Fig. S2 except that the catalyst precursor was calcined at different temperatures.

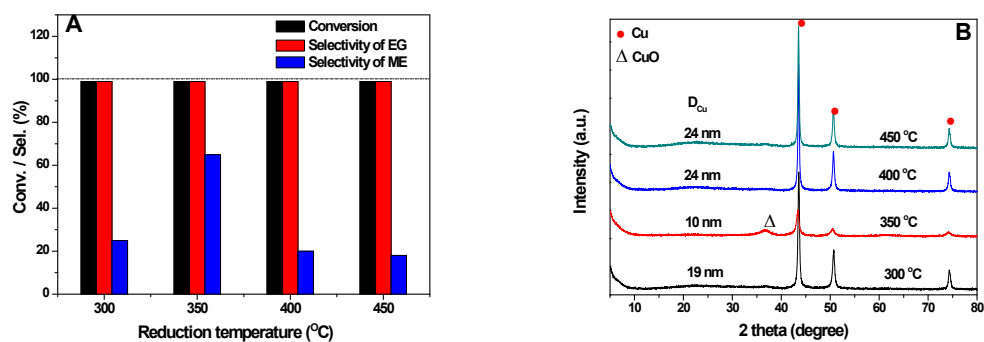

**Fig. S5.** (A) The conversion of EC, the selectivity to EG and ME versus  $\text{Cu}_8\text{-Mg}_1\text{-Zr}_{0.47}/\text{SiO}_2$  catalyst reduction temperature. The reaction parameters are identical with those for Fig. S2 except that the catalyst precursor was reduced at different temperatures. (B) XRD patterns of  $\text{Cu}_8\text{-Mg}_1\text{-Zr}_{0.47}/\text{SiO}_2$  catalysts after reduced at different temperatures.

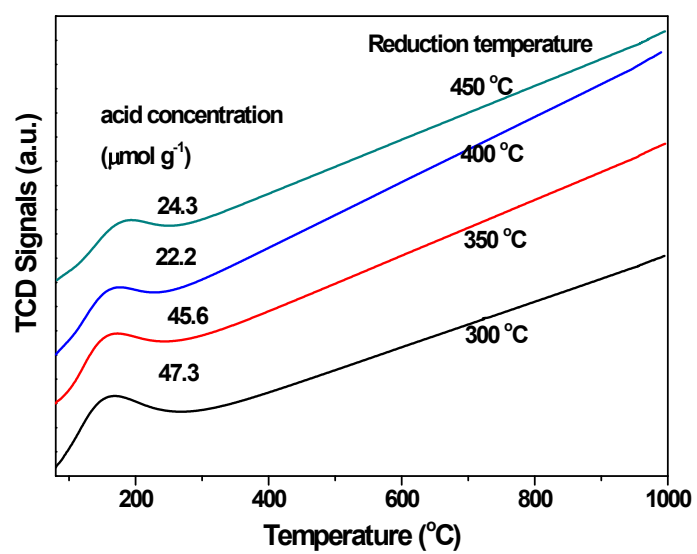

**Fig. S6.** NH<sub>3</sub>-TPD curves of Cu<sub>8</sub>-Mg<sub>1</sub>-Zr<sub>0.47</sub>/SiO<sub>2</sub> catalyst after reduced at different temperatures.

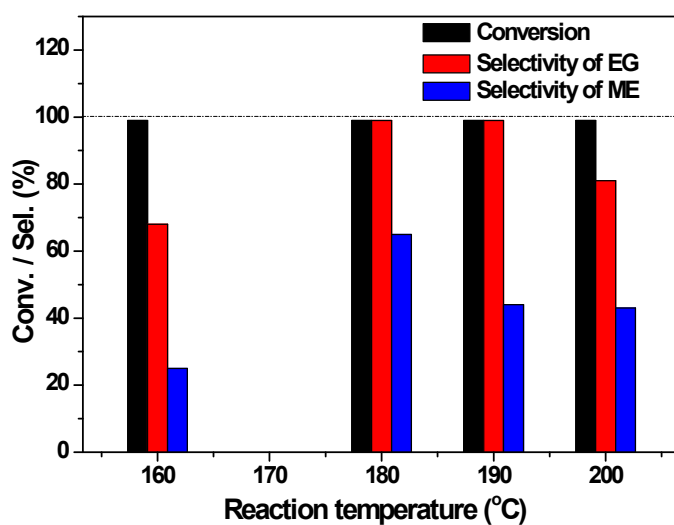

**Fig. S7.** The conversion of EC, the selectivity to EG and ME versus reaction temperature with  $\text{Cu}_8\text{-Mg}_1\text{-Zr}_{0.47}/\text{SiO}_2$  catalyst. The reaction parameters are identical with those for Fig. S2 except that the reaction was conducted at different temperatures.

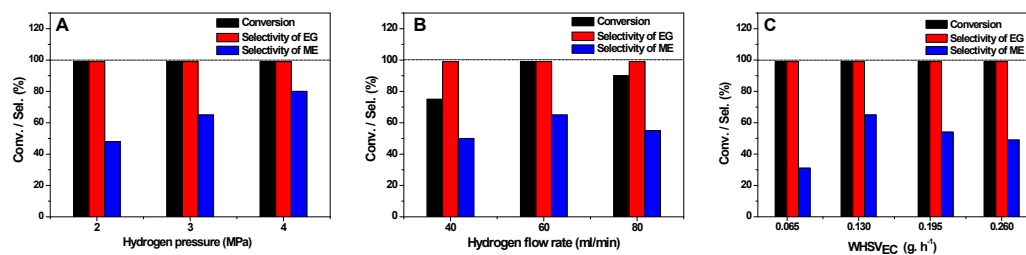

**Fig. S8.** (A) The conversion of EC, the selectivity to EG and ME versus hydrogen pressure; (B) effect of hydrogen flow rate on the conversion of EC, the selectivity to ME and EG; (C) The conversion of EC, the selectivity to ME and EG versus WHSV<sub>EC</sub>. Other reaction parameters are identical with those for Fig. S2.
